# Supplementary material for: Evidence of Increased Oxidative Stress in the Placental Tissue of Women Who Suffered an Episode of Psychosis during Pregnancy
Source: MDPI journal article supplement (doi:10.3390/antiox12010179), 2023-01-12
Supplement: s1 [file s1]

- Homo sapiens (Human)- Q9Y5S8 · NOX1\_HUMAN
- Homo sapiens (Human)- P04839 · NOX2- CY24B\_HUMAN
- Homo sapiens (Human)- iNOS-S100A8/9\_HUMAN
- Homo sapiens (Human)- eNOS-P29474 · NOS3\_HUMAN
- Homo sapiens (Human)-PARP- P09874 · PARP1\_HUMAN
- Homo sapiens (Human)-TBP- P20226 · TBP\_HUMAN
